# Supplementary material
Source: MDPI journal article supplement (https://www.mdpi.com/2308-3417/8/1/10)
Supplement: s1 [file s1]

**Table S1.** 30-Items Frailty Index.

| <b>FRAILITY INDEX 30 ITEMS</b>            | <b>0 POINT</b>     | <b>0.5 POINT</b>  | <b>1 POINT</b> |
|-------------------------------------------|--------------------|-------------------|----------------|
| <b>Bathing</b>                            | Preserved          | Impaired          | Lost           |
| <b>Dressing</b>                           | Preserved          | Impaired          | Lost           |
| <b>Toileting</b>                          | Preserved          | Impaired          | Lost           |
| <b>Transferring</b>                       | Preserved          | Impaired          | Lost           |
| <b>Continence</b>                         | Preserved          | Impaired          | Lost           |
| <b>Feeding</b>                            | Preserved          | Impaired          | Lost           |
| <b>Ability to Use Telephone</b>           | Preserved          | Impaired          | Lost           |
| <b>Shopping</b>                           | Preserved          | Impaired          | Lost           |
| <b>Food Preparation</b>                   | Preserved          | Impaired          | Lost           |
| <b>Housekeeping</b>                       | Preserved          | Impaired          | Lost           |
| <b>Laundry</b>                            | Preserved          | Impaired          | Lost           |
| <b>Mode of Transportation</b>             | Preserved          | Impaired          | Lost           |
| <b>Responsability for Own Medications</b> | Preserved          | Impaired          | Lost           |
| <b>Ability to Handle Finances</b>         | Preserved          | Impaired          | Lost           |
| <b>BMI</b>                                | < 25               | 25-29             | ≥ 30           |
| <b>SPSMQ</b>                              | 0-3                | 4-7               | ≥ 8            |
| <b>MNA-sf</b>                             | 12-14              | 8-11              | ≤ 7            |
| <b>CIRS</b>                               | 0                  | 1-2               | ≥ 3            |
| <b>Number of Medication</b>               | 0-3                | 4-6               | ≥ 7            |
| <b>Co-habitation Status</b>               | Living with Family | Institutionalized | Living Alone   |
| <b>SPPB</b>                               | 10-12              | 7-9               | ≤ 7            |
| <b>History of Hypertension</b>            | No                 | Suspect           | Yes            |
| <b>History of Heart Failure</b>           | No                 | Suspect           | Yes            |
| <b>History of Ischemic Heart Disease</b>  | No                 | Suspect           | Yes            |
| <b>History of Diabetes</b>                | No                 | Suspect           | Yes            |
| <b>History of Stroke</b>                  | No                 | Suspect           | Yes            |
| <b>History of Chronic Renal Failure</b>   | No                 | Suspect           | Yes            |
| <b>History of Chronic Liver Failure</b>   | No                 | Suspect           | Yes            |
| <b>History of COPD</b>                    | No                 | Suspect           | Yes            |
| <b>History of Cancer</b>                  | No                 | Suspect           | Yes            |
| <b>TOTAL SCORE</b>                        |                    | <b>/30 =</b>      |                |
